# Supplementary material for: miRNA expression profiles and molecular networks in resting and LPS-activated BV-2 microglia—Effect of cannabinoids
Source: PubMed Central journal article supplement (PMC6370221; doi:10.1371/journal.pone.0212039), 2019-02-11
Supplement: pone.0212039.s001.pdf [file pone.0212039.s001.pdf]

**S1 Table. Selected miR-146a target genes**

| Gene Name                                      | Description                                             | Accession*  | Fold change<br>(versus control) |     |     | Fold change<br>(versus LPS) |           |
|------------------------------------------------|---------------------------------------------------------|-------------|---------------------------------|-----|-----|-----------------------------|-----------|
|                                                |                                                         |             | LPS                             | CBD | THC | CBD + LPS                   | THC + LPS |
| <b><i>Immune response and inflammation</i></b> |                                                         |             |                                 |     |     |                             |           |
| <i>Il6</i>                                     | interleukin 6                                           | MGI:96559   | 159                             | 3.1 | 0.3 | 0.5                         | 0.5       |
| <b><i>Host defense</i></b>                     |                                                         |             |                                 |     |     |                             |           |
| <i>Rsad2</i>                                   | radical S-adenosyl<br>methionine domain<br>containing 2 | MGI:1929628 | 36.6                            | 4.5 | 0.5 | 1.4                         | 0.7       |
| <b><i>TLR signaling</i></b>                    |                                                         |             |                                 |     |     |                             |           |
| <i>Irak2</i>                                   | interleukin-1 receptor-<br>associated kinase 2          | MGI:2429603 | 4.0                             | 1.1 | 1.1 | 0.9                         | 0.9       |
| <i>Cot/ Tpl2 /<br/>Map3k8</i>                  | mitogen-activated<br>protein kinase kinase<br>kinase 8  | MGI:1346878 | 4.6                             | 1.3 | 4.0 | 0.9                         | 0.8       |
| <b><i>Chemokines</i></b>                       |                                                         |             |                                 |     |     |                             |           |
| <i>Cxcr4</i>                                   | chemokine (C-X-C motif)<br>receptor 4                   | MGI:109563  | 0.1                             | 4.6 | 0.2 | 2.5                         | 4.0       |
| <b><i>Metabolic</i></b>                        |                                                         |             |                                 |     |     |                             |           |
| <i>Nos2</i>                                    | nitric oxide synthase 2,<br>inducible                   | MGI:97361   | 553                             | 2.7 | 0.7 | 0.9                         | 0.7       |
| <b><i>Cell death and apoptosis</i></b>         |                                                         |             |                                 |     |     |                             |           |
| <i>Fas</i>                                     | Fas (TNF receptor<br>superfamily member 6)              | MGI:95484   | 22.6                            | 1.8 | 0.7 | 0.8                         | 0.8       |

**Notch signaling**

*Notch1* notch 1 MGI:97363 6.6 1.3 1.1 1.0 1.1

**Regulation of transcription**

*Relb* avian MGI:103289 3.5 1.5 0.9 1.2 0.9

reticuloendotheliosis  
viral (v-rel) oncogene  
related B

*Stat1* signal transducer and MGI:103063 3.1 1.8 0.8 0.8 0.8

activator of  
transcription 1

*Pparg* peroxisome proliferator MGI:97747 0.4 1.2 0.9 0.7 1.0

activated receptor  
gamma

**Stress response**

*Vegfa* vascular endothelial MGI:103178 0.8 2.1 1.3 3.2 1.3

growth factor A

\* Accession number available at Mouse Genome Informatics (MGI): <http://www.informatics.jax.org/>
