# Supplementary material for: miRNA expression profiles and molecular networks in resting and LPS-activated BV-2 microglia—Effect of cannabinoids
Source: PubMed Central journal article supplement (PMC6370221; doi:10.1371/journal.pone.0212039), 2019-02-11
Supplement: pone.0212039.s002.pdf [file pone.0212039.s002.pdf]

**S2 Table. Selected miR-155 target genes**

| Gene Name                                | Description                                                              | Accession*  | Fold change<br>(versus control) |     |     | Fold change<br>(versus LPS) |           |
|------------------------------------------|--------------------------------------------------------------------------|-------------|---------------------------------|-----|-----|-----------------------------|-----------|
|                                          |                                                                          |             | LPS                             | CBD | THC | CBD + LPS                   | THC + LPS |
| <b>Immune response and inflammation</b>  |                                                                          |             |                                 |     |     |                             |           |
| <i>Il6ra</i>                             | interleukin 6 receptor, alpha                                            | MGI:105304  | 0.3                             | 0.7 | 0.9 | 1.0                         | 1.3       |
| <i>Mr1</i>                               | major histocompatibility complex, class I-related                        | MGI:1195463 | 0.5                             | 1.9 | 0.6 | 0.6                         | 1.0       |
| <b>TLR signaling</b>                     |                                                                          |             |                                 |     |     |                             |           |
| <i>Irak3</i>                             | interleukin-1 receptor-associated kinase 3                               | MGI:1921164 | 5.5                             | 1.1 | 1.0 | 0.5                         | 0.8       |
| <i>Ikbke</i>                             | inhibitor of kappaB kinase epsilon                                       | MGI:1929612 | 8.7                             | 1.1 | 0.9 | 0.9                         | 0.8       |
| <i>Inpp5d/Ship1</i>                      | inositol polyphosphate-5-phosphatase D                                   | MGI:107357  | 0.4                             | 0.7 | 1.0 | 0.8                         | 1.3       |
| <b>Signal transduction</b>               |                                                                          |             |                                 |     |     |                             |           |
| <i>Cish</i>                              | cytokine inducible SH2-containing protein                                | MGI:103159  | 38.5                            | 1.5 | 0.7 | 0.8                         | 0.7       |
| <i>Socs1</i>                             | suppressor of cytokine signaling 1                                       | MGI:1354910 | 20.6                            | 1.6 | 0.6 | 1.0                         | 0.8       |
| <b>Apoptosis</b>                         |                                                                          |             |                                 |     |     |                             |           |
| <i>Cflar</i>                             | CASP8 and FADD-like apoptosis regulator                                  | MGI:1336166 | 7.6                             | 2.0 | 1.0 | 1.1                         | 0.8       |
| <b>Stress response</b>                   |                                                                          |             |                                 |     |     |                             |           |
| <i>Hmox1</i>                             | heme oxygenase (decycling) 1                                             | MGI:96163   | 0.7                             | 3.0 | 1.2 | 9.4                         | 2.6       |
| <i>Bach1</i>                             | BTB and CNC homology 1                                                   | MGI:894680  | 0.8                             | 1.4 | 1.0 | 1.8                         | 1.1       |
| <b>Cell cycle - transcription factor</b> |                                                                          |             |                                 |     |     |                             |           |
| <i>E2f2</i>                              | E2F transcription factor 2                                               | MGI:1096341 | 0.3                             | 1.4 | 0.8 | 1.0                         | 1.3       |
| <b>Regulation of transcription</b>       |                                                                          |             |                                 |     |     |                             |           |
| <i>Nfe2l2/Nrf2</i>                       | nuclear factor, erythroid derived 2, like 2                              | MGI:108420  | 1.9                             | 0.9 | 1.1 | 0.9                         | 0.9       |
| <i>Cebpb</i>                             | CCAAT/enhancer binding protein (C/EBP), beta                             | MGI:88373   | 3.1                             | 1.8 | 1.1 | 1.8                         | 1.2       |
| <i>Etv3</i>                              | ets variant gene 3                                                       | MGI:1350926 | 3.0                             | 1.1 | 1.1 | 1.2                         | 0.9       |
| <i>Spi1</i>                              | spleen focus forming virus (SFFV) proviral integration oncogene          | MGI:98282   | 2.7                             | 0.9 | 1.0 | 0.9                         | 0.8       |
| <i>Maff</i>                              | v-maf musculoaponeurotic fibrosarcoma oncogene family, protein F (avian) | MGI:96910   | 2.3                             | 1.2 | 1.0 | 1.1                         | 1.0       |
| <i>Trp53inp1</i>                         | transformation related protein 53 inducible nuclear protein 1            | MGI:1926609 | 1.1                             | 2.2 | 0.9 | 1.1                         | 1.2       |

|                                         |                                                                           |             |     |     |     |     |     |
|-----------------------------------------|---------------------------------------------------------------------------|-------------|-----|-----|-----|-----|-----|
| <i>Mafb</i>                             | v-maf musculoaponeurotic fibrosarcoma oncogene family, protein B (avian)  | MGI:104555  | 1.0 | 0.5 | 0.9 | 0.2 | 0.2 |
| <i>Rora</i>                             | RAR-related orphan receptor alpha                                         | MGI:104661  | 0.8 | 2.5 | 0.9 | 2.9 | 1.4 |
| <i>Zfp652</i>                           | zinc finger protein 652                                                   | MGI:2442221 | 0.5 | 1.1 | 1.0 | 1.2 | 1.2 |
| <i>Fos</i>                              | FBJ osteosarcoma oncogene                                                 | MGI:95574   | 0.5 | 0.4 | 0.5 | 0.2 | 0.8 |
| <i>Nfatc2</i>                           | nuclear factor of activated T cells, cytoplasmic, calcineurin dependent 2 | MGI:102463  | 0.3 | 0.7 | 1.0 | 0.7 | 1.3 |
| <b>Notch signaling</b>                  |                                                                           |             |     |     |     |     |     |
| <i>Notch2</i>                           | notch 2                                                                   | MGI:97364   | 2.0 | 1.0 | 1.1 | 1.2 | 0.9 |
| <i>Tspan14</i>                          | tetraspanin 14                                                            | MGI:1196325 | 0.5 | 0.8 | 1.0 | 0.8 | 1.0 |
| <b>Lipid signaling and metabolism</b>   |                                                                           |             |     |     |     |     |     |
| <i>Lpin1</i>                            | lipin 1                                                                   | MGI:1891340 | 0.1 | 2.3 | 0.8 | 3.0 | 2.0 |
| <i>S1pr1</i>                            | sphingosine-1-phosphate receptor 1                                        | MGI:1096355 | 0.3 | 1.5 | 1.2 | 1.0 | 1.3 |
| <b>TOR signaling</b>                    |                                                                           |             |     |     |     |     |     |
| <i>Rictor</i>                           | RPTOR independent companion of MTOR, complex 2                            | MGI:1926007 | 2.4 | 1.0 | 1.1 | 0.9 | 0.8 |
| <b>Membrane transport and secretion</b> |                                                                           |             |     |     |     |     |     |
| <i>Slc30a1</i>                          | solute carrier family 30 (zinc transporter), member 1                     | MGI:1345281 | 0.8 | 3.3 | 1.2 | 5.0 | 1.8 |
| <i>Chrna2</i>                           | cholinergic receptor, nicotinic, alpha polypeptide 2 (neuronal)           | MGI:87886   | 3.1 | 0.5 | 1.3 | 0.5 | 0.9 |
| <b>Adhesion and migration</b>           |                                                                           |             |     |     |     |     |     |
| <i>Ptprj</i>                            | protein tyrosine phosphatase, receptor type, J                            | MGI:104574  | 6.6 | 0.7 | 1.3 | 0.9 | 0.8 |
| <b>Metabolic</b>                        |                                                                           |             |     |     |     |     |     |
| <i>Cpd</i>                              | carboxypeptidase D                                                        | MGI:107265  | 4.5 | 0.9 | 1.1 | 0.7 | 0.9 |
| <i>Agtrap</i>                           | angiotensin II, type I receptor-associated protein                        | MGI:1339977 | 2.0 | 1.4 | 0.9 | 1.0 | 1.0 |
| <b>Purine and pyrimidine metabolism</b> |                                                                           |             |     |     |     |     |     |
| <i>Aicda/Aid</i>                        | activation-induced cytidine deaminase                                     | MGI:1342279 | 0.2 | 1.6 | 0.8 | 0.5 | 1.0 |

\* Accession number available at Mouse Genome Informatics (MGI): <http://www.informatics.jax.org/>
