# Supplementary material for: miRNA expression profiles and molecular networks in resting and LPS-activated BV-2 microglia—Effect of cannabinoids
Source: PubMed Central journal article supplement (PMC6370221; doi:10.1371/journal.pone.0212039), 2019-02-11
Supplement: pone.0212039.s003.pdf [file pone.0212039.s003.pdf]

**S3 Table. Selected miR-34a target genes**

| GeneName                                | Description                                                                     | Accession*  | Fold change<br>(versus control) |      |     | Fold change<br>(versus LPS) |           |
|-----------------------------------------|---------------------------------------------------------------------------------|-------------|---------------------------------|------|-----|-----------------------------|-----------|
|                                         |                                                                                 |             | LPS                             | CBD  | THC | CBD + LPS                   | THC + LPS |
| <b>Immune response and inflammation</b> |                                                                                 |             |                                 |      |     |                             |           |
| <i>Il6</i>                              | interleukin 6                                                                   | MGI:96559   | 158.8                           | 3.1  | 0.3 | 0.5                         | 0.5       |
| <i>Tnf</i>                              | tumor necrosis factor                                                           | MGI:104798  | 41.1                            | 0.9  | 1.1 | 0.7                         | 0.7       |
| <b>Signal transduction</b>              |                                                                                 |             |                                 |      |     |                             |           |
| <i>Il6st</i>                            | interleukin 6 signal transducer                                                 | MGI:96560   | 0.4                             | 1.0  | 1.1 | 1.2                         | 1.2       |
| <i>Axl</i>                              | AXL receptor tyrosine kinase                                                    | MGI:1347244 | 1.4                             | 3.6  | 0.5 | 1.1                         | 1.1       |
| <b>Stress response</b>                  |                                                                                 |             |                                 |      |     |                             |           |
| <i>Ddit4</i>                            | DNA-damage-inducible transcript 4                                               | MGI:1921997 | 0.5                             | 13.2 | 1.0 | 22.8                        | 2.6       |
| <i>Ndrp1</i>                            | N-myc downstream regulated gene 1                                               | MGI:1341799 | 0.6                             | 9.6  | 0.8 | 5.5                         | 2.3       |
| <i>Slc7a11/xCT</i>                      | solute carrier family 7 (cationic amino acid transporter, y+ system), member 11 | MGI:1347355 | 1.6                             | 1.4  | 1.0 | 2.0                         | 1.1       |
| <b>Notch signaling</b>                  |                                                                                 |             |                                 |      |     |                             |           |
| <i>Notch1</i>                           | notch 1                                                                         | MGI:97363   | 6.6                             | 1.3  | 1.1 | 1.0                         | 1.1       |
| <i>Notch2</i>                           | notch 2                                                                         | MGI:97364   | 2.0                             | 1.0  | 1.1 | 1.2                         | 0.9       |
| <i>Dll1</i>                             | delta-like 1 (Drosophila)                                                       | MGI:104659  | 60.6                            | 11.2 | 1.9 | 0.8                         | 0.9       |
| <b>Cell cycle</b>                       |                                                                                 |             |                                 |      |     |                             |           |
| <i>Ccnd1</i>                            | cyclin D1                                                                       | MGI:88313   | 0.3                             | 0.5  | 0.9 | 0.4                         | 1.2       |
| <i>Ccne2</i>                            | cyclin E2                                                                       | MGI:1329034 | 0.6                             | 0.5  | 0.9 | 0.7                         | 1.0       |
| <i>Cdkn1a/p21</i>                       | cyclin-dependent kinase inhibitor 1A (P21)                                      | MGI:104556  | 7.4                             | 3.3  | 0.6 | 1.5                         | 0.8       |
| <i>Cdc25a</i>                           | cell division cycle 25A                                                         | MGI:103198  | 0.8                             | 0.6  | 0.8 | 0.6                         | 1.0       |
| <i>E2f5</i>                             | E2F transcription factor 5                                                      | MGI:105091  | 0.9                             | 0.5  | 1.2 | 0.8                         | 1.0       |
| <b>Interferon regulated</b>             |                                                                                 |             |                                 |      |     |                             |           |
| <i>Ifnb1</i>                            | interferon beta 1, fibroblast                                                   | MGI:107657  | 76.0                            | 4.3  | 0.4 | 0.4                         | 0.4       |
| <b>Proinflammatory chemokines</b>       |                                                                                 |             |                                 |      |     |                             |           |
| <i>Ccl22</i>                            | chemokine (C-C motif) ligand 22                                                 | MGI:1306779 | 10.1                            | 0.9  | 0.6 | 0.1                         | 0.6       |

**Lipid signaling and metabolism**

*Lpin1* lipin 1 MGI:1891340 0.1 2.3 0.8 3.0 2.0

**TGF- $\beta$  signaling**

*Tgfb2* TGFB-induced factor homeobox 2 MGI:1915299 0.5 0.8 0.9 0.7 1.1

**Regulation of transcription**

*Foxp1* forkhead box P1 MGI:1914004 2.2 0.8 1.1 0.8 0.8

*Trp53inp1* transformation related protein 53 inducible nuclear protein 1 MGI:1926609 1.1 2.2 0.9 1.1 1.2

*Hes2* hairy and enhancer of split 2 (Drosophila) MGI:1098624 0.7 1.8 1.4 0.4 1.0

*Rela* v-rel reticuloendotheliosis viral oncogene homolog A (avian) MGI:103290 1.7 1.3 1.0 1.4 1.0

*Rora* RAR-related orphan receptor alpha MGI:104661 0.8 2.5 0.9 2.9 1.4

**Apoptosis**

*Gas1* growth arrest specific 1 MGI:95655 2.8 1.4 1.6 2.0 2.6

*Mdm2* transformed mouse 3T3 cell double minute 2 MGI:96952 2.1 1.5 1.0 1.8 1.0

*Pdgfrb* platelet derived growth factor receptor, beta polypeptide MGI:97531 2.4 1.2 0.8 0.8 0.8

*Src* Rous sarcoma oncogene MGI:98397 5.3 1.5 1.0 1.2 0.9

**NF- $\kappa$ B signaling**

*Nfkb1* nuclear factor of kappa light polypeptide gene enhancer in B cells 1, p105 MGI:97312 5.3 1.0 1.0 0.9 0.8

**Membrane transport and secretion**

*Cnnm3* cyclin M3 MGI:2151055 0.5 1.1 1.1 1.2 1.2

*Aqp9* aquaporin 9 MGI:1891066 1.6 9.9 0.7 9.6 1.6

**Senescence**

*Hbp1* high mobility group box transcription factor 1 MGI:894659 1.9 1.7 1.1 1.3 1.0

**Wnt signaling**

*Wnt1* wingless-related MMTV integration site 1 MGI:98953 0.9 1.2 0.9 0.6 0.7

\* Accession number available at Mouse Genome Informatics (MGI): <http://www.informatics.jax.org/>
